# Supplementary material
Source: PubMed Central journal article supplement (PMC5964021)

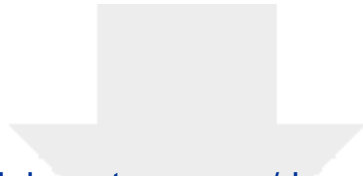

[Click here to access/download](#)

**Supplementary Material**

Supplementary File-Feb28-2018a.docx

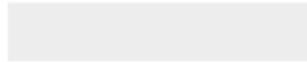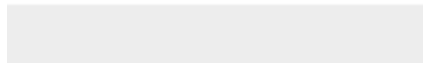

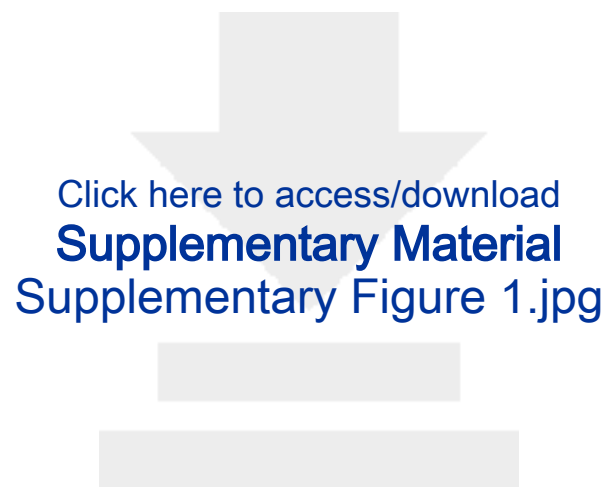

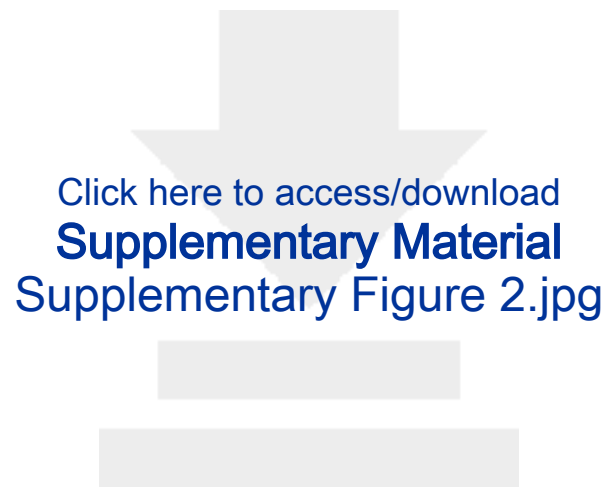

Supplement: NIHMS957948-supplement-supplement_1.pdf [file NIHMS957948-supplement-supplement_1.pdf]
